# Supplementary material
Source: PubMed Central journal article supplement (PMC8809887)
Supplement: NIHMS1763876-supplement-Supplementary_Tables_1_and_2.pdf [file NIHMS1763876-supplement-Supplementary_Tables_1_and_2.pdf]

**Supplementary Table 1. Patient characteristics**

**Discovery cohort (n=328)**

| <b>Age</b>                                    | Median 62 years (range 20-88) |      |
|-----------------------------------------------|-------------------------------|------|
| <b>Gender</b>                                 | N                             | %    |
| Male                                          | 196                           | 59.0 |
| Female                                        | 132                           | 41.0 |
| <b>Tumor Type</b>                             |                               |      |
| Non-small cell lung cancer                    | 127                           | 39.8 |
| Soft-tissue sarcomas                          | 46                            | 14.2 |
| Bladder cancer                                | 31                            | 9.3  |
| Colorectal cancer                             | 27                            | 8.1  |
| Head and neck                                 | 12                            | 3.6  |
| Renal                                         | 11                            | 3.3  |
| Breast                                        | 7                             |      |
| Other*                                        | 67                            | 21.7 |
| <b>Performance status</b>                     |                               |      |
| ≤ 1                                           | 304                           | 92.8 |
| > 1                                           | 24                            | 7.2  |
| <b>Stage IV cancer</b>                        | 328                           | 100  |
| <b>Microsatellite status</b>                  |                               |      |
| MSI-H                                         | 6                             | 1.8  |
| MSS                                           | 221                           | 67.4 |
| Missing                                       | 101                           | 30.8 |
| <b>Previous lines of treatment</b>            |                               |      |
| ≤ 1                                           | 203                           | 62.0 |
| > 1                                           | 125                           | 38.0 |
| <b>Treatment</b>                              |                               |      |
| Anti-PD1                                      | 195                           | 59.6 |
| Anti-PD-L1                                    | 100                           | 30.1 |
| PD1 or anti-PD-L1 + another immune-checkpoint | 33                            | 10.2 |
| <b>Smoking status</b>                         |                               |      |
| Never smoked                                  | 144                           | 43.9 |
| Current or former smoker                      | 176                           | 53.6 |
| Missing data                                  | 8                             | 2.5  |

| <b>Validation Cohort A (n=131)</b> |                               |      |
|------------------------------------|-------------------------------|------|
| <b>Age</b>                         | Median 64 years (range 34-87) |      |
| <b>Gender</b>                      |                               |      |
| Male                               | 89                            | 67.9 |
| Female                             | 42                            | 32.1 |
| <b>Tumor Type</b>                  |                               |      |
| Head and neck                      | 13                            | 9.9  |
| Non-small cell lung cancer         | 105                           | 80.1 |
| Kidney                             | 9                             | 6.9  |
| Others                             | 4                             | 3.1  |
| <b>Performance status</b>          |                               |      |
| ≤ 1                                | 101                           | 77.1 |
| > 1                                | 30                            | 22.9 |
| <b>Previous lines of treatment</b> |                               |      |
| ≤ 1                                | 50                            | 38.2 |
| > 1                                | 81                            | 61.8 |
| <b>Treatment</b>                   |                               |      |
| Anti-PD1                           | 129                           | 98.5 |
| Anti-PD-L1                         | 2                             | 1.5  |
| <b>Validation Cohort B (n=81)</b>  |                               |      |
| <b>Age</b>                         | Median 63 years (range 46-83) |      |
| <b>Gender</b>                      |                               |      |
| Male                               | 51                            | 63   |
| Female                             | 30                            | 37   |
| <b>Tumor Type</b>                  |                               |      |
| Bladder                            | 24                            | 29.6 |
| Non-small cell lung cancer         | 56                            | 69.1 |
| Colorectal cancer                  | 1                             | 1.3  |
| <b>Performance status</b>          |                               |      |
| ≤ 1                                | 62                            | 76.5 |
| > 1                                | 19                            | 23.5 |
| <b>Treatment</b>                   |                               |      |
| Anti-PD1                           | 64                            | 79   |
| Anti-PD-L1                         | 17                            | 21   |

**\*Other tumors:** thyroid carcinoma, gastrointestinal stromal tumor, cholangiocarcinoma, pancreatic adenocarcinoma, anal carcinoma, cervical cancer, ovarian cancer, vulvar carcinoma, endometrial carcinoma, cervical cancer, gastric carcinoma.

**Supplementary Table 2. Multivariate model for objective response in discovery cohort (n=328)**

| <b>Variable</b>        | <b>Odds ratio (95 % C.I.)</b> | <b>p-value</b> |
|------------------------|-------------------------------|----------------|
| Performance status     |                               |                |
| ≤ 1                    | 5.9 (1.2 to 28.2)             | 0.024          |
| > 1                    | 1 (referent)                  |                |
| Tumor type             |                               |                |
| NSCLC                  | 1 (referent)                  | 0.021          |
| Other                  | 0.49 (0.26 to 0.89)           |                |
| TPS code               |                               |                |
| < 1                    | 0.41 (0.21 to 0.81)           | 0.01           |
| ≥ 1                    | 1 (referent)                  |                |
| CD8 density            |                               |                |
| Low density            | 0.39 (0.21 to 0.73)           | 0.003          |
| High density           | 1 (referent)                  |                |
| Presence of mature TLS |                               |                |
| Low density            | 0.34 (0.17 to 0.67)           | <0.0001        |
| High density           | 1 (referent)                  |                |
